# Supplementary material
Source: PubMed Central journal article supplement (PMC4809774)
Supplement: NIHMS768053-supplement-Supplemental.pdf [file NIHMS768053-supplement-Supplemental.pdf]

# Gun ownership and social gun culture

---

## SUPPLEMENTARY APPENDIX

### Table of Contents

|                                                                                                                                   |           |
|-----------------------------------------------------------------------------------------------------------------------------------|-----------|
| <b>SUPPLEMENTARY APPENDIX .....</b>                                                                                               | <b>1</b>  |
| <b>Supplementary Appendix I: Information regarding YouGov.....</b>                                                                | <b>2</b>  |
| <b>Supplementary Appendix II: Survey Instrument and codebook.....</b>                                                             | <b>3</b>  |
| <b>Supplementary Appendix III: Survey Methodology Report from YouGov .....</b>                                                    | <b>23</b> |
| <b>Supplementary Appendix IV: Covariates used for analysis .....</b>                                                              | <b>32</b> |
| <b>Supplementary Table 1: Correlation between variables for social gun culture .....</b>                                          | <b>35</b> |
| <b>Supplementary Table 2: Association of individual and state characteristics with gun ownership (sensitivity analysis) .....</b> | <b>36</b> |

## **Supplementary Appendix I: Information regarding YouGov.**

YouGov is a non-partisan international research firm that uses Internet polling to acquire its data. It focuses on politics, public affairs, products, brands, other topics of general interest, or client requests. The company was established in 2000 and is headquartered in the United Kingdom, YouGov is a member of the British Polling Council and is registered with the UK Information Commissioner's Office. Their aim is to provide a broad and accurate portrait of what the world really believes. They can create specific surveys for analysis, and the data can be used by news media, public affairs groups, institutions, political campaigns, companies, and marketing agencies.

A typical YouGov survey is only about 20 to 30 questions in total, and the longest surveys do not take more than 20 minutes to complete. Their methodology solicits responses from an invited group of Internet users, and those responses are weighed according to demographic information from the population of interest. These samples are drawn from a pool of three million people worldwide. Several of their proprietary data products includes: BrandIndex, (daily brand perception tracker) YouGov Omnibus, (a way to obtain answers from both national and selected samples) Pulse, (tracks actual online consumer behavior across laptops, smartphones and tablets) and YouGov Profiles (tool for media planning, segmentation and forecasting). YouGov also publishes a number of syndicated reports, such as the annual Global Survey of Wealth & Affluence, which provides market intelligence on a range of industry sectors. YouGov has a track record as one of the UK's most accurate pollster. In many YouGov polls where data could be compared to actual outcomes, they are typically within a few percentage points. Domestically, during the 2012 US Presidential Election, on the basis of one of the most extensive opinion polls ever conducted, YouGov predicted that Barack Obama would win the national vote by 2%. This prediction was one of the most accurate out of all pollsters covering the election, as they were within 1% of the actual result. Additionally, YouGov accurately predicted the volume of Apple iPhone sales in January 2013.

## Supplementary Appendix II: Survey Instrument and codebook.

### Variable List

```
=====
```

| Name         | Description                                                               |
|--------------|---------------------------------------------------------------------------|
| ----         | -----                                                                     |
| caseid       | Case ID                                                                   |
| weight       | Case weight                                                               |
| DPS041       | State                                                                     |
| DPS042       | Age                                                                       |
| DPS042_years | Age in years                                                              |
| DPS043       | Ethnicity                                                                 |
| DPS044_1     | Race - White                                                              |
| DPS044_2     | Race - Black or African-American                                          |
| DPS044_3     | Race - Asian or Asian-American                                            |
| DPS044_4     | Race - Native Hawaiian or Other Pacific Islander                          |
| DPS044_5     | Race - American Indian or Alaska Native                                   |
| DPS044_6     | Race - Other                                                              |
| DPS044_9     | Race - Refused                                                            |
| DPS045       | Sex                                                                       |
| DPS046       | Marital                                                                   |
| DPS047_1     | Child_Grps - I have no children                                           |
| DPS047_2     | Child_Grps - 0-2 years                                                    |
| DPS047_3     | Child_Grps - 3-5 years                                                    |
| DPS047_4     | Child_Grps - 6-10 years                                                   |
| DPS047_5     | Child_Grps - 11-13 years                                                  |
| DPS047_6     | Child_Grps - 14-18 years                                                  |
| DPS047_7     | Child_Grps - 19 years or older                                            |
| DPS047_8     | Child_Grps - Refused                                                      |
| DPS048       | Education                                                                 |
| DPS049       | Employment                                                                |
| DPS050       | Income                                                                    |
| DPS051_lang  | Language                                                                  |
| Q1_1         | Gun ownership status - Owner, gifted                                      |
| Q1_2         | Gun ownership status - Owner, bought before 2000                          |
| Q1_3         | Gun ownership status - Owner, bought after 2000                           |
| Q1_4         | Gun ownership status - Owner, hunter                                      |
| Q1_5         | Gun ownership status - Owner, attended safety classes                     |
| Q1_6         | Gun ownership status - Owner, advocate responsible ownership              |
| Q1_7         | Gun ownership status - Non-owner, might buy                               |
| Q1_8         | Gun ownership status - Non-owner, will never buy                          |
| Q2_1         | Family gun ownership culture - No friends own guns                        |
| Q2_2         | Family gun ownership culture - No family members own guns                 |
| Q2_3         | Family gun ownership culture - Some friends own guns                      |
| Q2_4         | Family gun ownership culture - Some family members own gun                |
| Q2_5         | Family gun ownership culture - Social circle thinks less of non-ownership |
| Q2_6         | Family gun ownership culture - Family thinks less of non-ownership        |
| Q2_7         | Family gun ownership culture - Social life with family involves guns      |
| Q2_8         | Family gun ownership culture - Social life with friends involves guns     |
| Q2_9         | Family gun ownership culture - None                                       |

- Q3\_1 Gun ownership attitude - Carrying gun feels safe
- Q3\_2 Gun ownership attitude - Carrying gun feels powerful
- Q3\_3 Gun ownership attitude - Belonging to organization feels safe
- Q3\_4 Gun ownership attitude - Belonging to organization feels powerful
- Q3\_5 Gun ownership attitude - Don't like being around guns / could hurt someone
- Q3\_6 Gun ownership attitude - Don't like people with guns / might kill someone
- Q3\_7 Gun ownership attitude - People feel nervous around people with guns
- Q3\_8 Gun ownership attitude - Respected people wouldn't have gun
- Q3\_9 Gun ownership attitude - Wish everyone get rid of guns
- Q3\_10 Gun ownership attitude - None
- Q4\_1 Attitude towards aggression - Must fight to show you're not a wimp
- Q4\_2 Attitude towards aggression - Must fight to get pride back
- Q4\_3 Attitude towards aggression - People will pay if I don't get what I want
- Q4\_4 Attitude towards aggression - Feel awful if didn't fight
- Q4\_5 Attitude towards aggression - Beating up person that insults makes me feel better
- Q4\_6 Attitude towards aggression - Must fight if you don't want to be a chump
- Q4\_7 Attitude towards aggression - A person who doesn't get even is a sucker
- Q4\_8 Attitude towards aggression - Social circle thinks I'm weak without gun
- Q4\_9 Attitude towards aggression - None
- Q5\_1 Reasons for owning a gun - Exciting to hold loaded gun
- Q5\_2 Reasons for owning a gun - People will look up to me
- Q5\_3 Reasons for owning a gun - Feel powerful or protected on street
- Q5\_4 Reasons for owning a gun - Feels powerful to hold loaded gun
- Q5\_5 Reasons for owning a gun - Don't owe the world anything
- Q5\_6 Reasons for owning a gun - Fun to play around with real gun
- Q5\_7 Reasons for owning a gun - Care about how actions affect others
- Q5\_8 Reasons for owning a gun - Responsibility to make world a better place
- Q5\_9 Reasons for owning a gun - None
- Q6\_1 Exposure to violence - Current neighborhood has low crime
- Q6\_2 Exposure to violence - Current neighborhood has crime, is unsafe
- Q6\_3 Exposure to violence - Have been shot at before
- Q6\_t Exposure to violence - Have been shot at before - Number of times
- Q6\_4 Exposure to violence - Someone has inflicted physical violence
- Q6\_5 Exposure to violence - Someone has inflicted threats
- Q6\_6 Exposure to violence - Witnessed violence

=====  
Verbatims  
=====

DPS051\_lang\_t Language - Other text

=====  
Variable Map and Codebook  
=====

Name: caseid  
Description: Case ID  
=====

Name: weight  
Description: Case weight

=====  
Name: DPS041  
Description: State  
Count Code Label  
-----  
63 1 Alabama  
18 2 Alaska  
120 4 Arizona  
39 5 Arkansas  
480 6 California  
67 8 Colorado  
42 9 Connecticut  
20 10 Delaware  
14 11 District of Columbia  
276 12 Florida  
130 13 Georgia  
18 15 Hawaii  
27 16 Idaho  
154 17 Illinois  
78 18 Indiana  
29 19 Iowa  
43 20 Kansas  
49 21 Kentucky  
36 22 Louisiana  
17 23 Maine  
61 24 Maryland  
59 25 Massachusetts  
101 26 Michigan  
62 27 Minnesota  
31 28 Mississippi  
66 29 Missouri  
13 30 Montana  
24 31 Nebraska  
59 32 Nevada  
13 33 New Hampshire  
108 34 New Jersey  
30 35 New Mexico  
214 36 New York  
115 37 North Carolina  
5 38 North Dakota  
159 39 Ohio  
48 40 Oklahoma  
85 41 Oregon  
157 42 Pennsylvania  
14 44 Rhode Island

|     |      |                                |
|-----|------|--------------------------------|
| 60  | 45   | South Carolina                 |
| 14  | 46   | South Dakota                   |
| 56  | 47   | Tennessee                      |
| 301 | 48   | Texas                          |
| 43  | 49   | Utah                           |
| 10  | 50   | Vermont                        |
| 103 | 51   | Virginia                       |
| 130 | 53   | Washington                     |
| 28  | 54   | West Virginia                  |
| 91  | 55   | Wisconsin                      |
| 9   | 56   | Wyoming                        |
| 0   | 60   | American Samoa                 |
| 0   | 64   | Federated States of Micronesia |
| 0   | 66   | Guam                           |
| 0   | 68   | Marshall Islands               |
| 0   | 69   | Northern Mariana Islands       |
| 0   | 70   | Palau                          |
| 0   | 72   | Puerto Rico                    |
| 0   | 74   | U.S. Minor Outlying Islands    |
| 0   | 78   | Virgin Islands                 |
| 0   | 81   | Alberta                        |
| 0   | 82   | British Columbia               |
| 0   | 83   | Manitoba                       |
| 0   | 84   | New Brunswick                  |
| 0   | 85   | Newfoundland                   |
| 0   | 86   | Northwest Territories          |
| 0   | 87   | Nova Scotia                    |
| 0   | 88   | Nunavut                        |
| 0   | 89   | Ontario                        |
| 0   | 90   | Prince Edward Island           |
| 0   | 91   | Quebec                         |
| 0   | 92   | Saskatchewan                   |
| 0   | 93   | Yukon Territory                |
| 0   | 99   | Not in the U.S. or Canada      |
| 5   | 777  | Don't know / Not sure          |
| 2   | 999  | Refused                        |
| 4   | 9998 | Skipped                        |
| 0   | 9999 | Not Asked                      |

-----  
Name: DPS042  
Description: Age  
Count Code Label

|       |       |               |
|-------|-------|---------------|
| ----- | ----- | -----         |
| 3871  | 1     | Age in years: |
| 26    | 7     | Don't know    |
| 102   | 9     | Refused       |
| 1     | 98    | Skipped       |

0 99 Not Asked

=====  
Name: DPS042\_years

Description: Age in years

Count Code Label

-----

0 998 Skipped

129 999 Not Asked

=====  
Name: DPS043

Description: Ethnicity

Count Code Label

-----

549 1 Hispanic or Latino

3310 2 Not Hispanic or Latino

139 9 Refused

2 98 Skipped

0 99 Not Asked

=====  
Name: DPS044\_1

Description: Race - White

Count Code Label

-----

3039 1 Yes

961 2 No

0 8 Skipped

0 9 Not Asked

=====  
Name: DPS044\_2

Description: Race - Black or African-American

Count Code Label

-----

516 1 Yes

3484 2 No

0 8 Skipped

0 9 Not Asked

=====  
Name: DPS044\_3

Description: Race - Asian or Asian-American

Count Code Label

-----

111 1 Yes

3889 2 No

0 8 Skipped

0 9 Not Asked

=====  
Name: DPS044\_4

|              |      |                                                  |
|--------------|------|--------------------------------------------------|
| Description: |      | Race - Native Hawaiian or Other Pacific Islander |
| Count Code   |      | Label                                            |
| -----        | ---- | -----                                            |
| 23           | 1    | Yes                                              |
| 3977         | 2    | No                                               |
| 0            | 8    | Skipped                                          |
| 0            | 9    | Not Asked                                        |

=====

|              |      |                                         |
|--------------|------|-----------------------------------------|
| Name:        |      | DPS044_5                                |
| Description: |      | Race - American Indian or Alaska Native |
| Count Code   |      | Label                                   |
| -----        | ---- | -----                                   |
| 90           | 1    | Yes                                     |
| 3910         | 2    | No                                      |
| 0            | 8    | Skipped                                 |
| 0            | 9    | Not Asked                               |

=====

|              |      |              |
|--------------|------|--------------|
| Name:        |      | DPS044_6     |
| Description: |      | Race - Other |
| Count Code   |      | Label        |
| -----        | ---- | -----        |
| 274          | 1    | Yes          |
| 3726         | 2    | No           |
| 0            | 8    | Skipped      |
| 0            | 9    | Not Asked    |

=====

|              |      |                |
|--------------|------|----------------|
| Name:        |      | DPS044_9       |
| Description: |      | Race - Refused |
| Count Code   |      | Label          |
| -----        | ---- | -----          |
| 102          | 1    | Yes            |
| 3898         | 2    | No             |
| 0            | 8    | Skipped        |
| 0            | 9    | Not Asked      |

=====

|              |      |           |
|--------------|------|-----------|
| Name:        |      | DPS045    |
| Description: |      | Sex       |
| Count Code   |      | Label     |
| -----        | ---- | -----     |
| 1765         | 1    | Male      |
| 2203         | 2    | Female    |
| 30           | 9    | Refused   |
| 2            | 98   | Skipped   |
| 0            | 99   | Not Asked |

=====

|              |  |         |
|--------------|--|---------|
| Name:        |  | DPS046  |
| Description: |  | Marital |

| Count | Code | Label                           |
|-------|------|---------------------------------|
| 1935  | 1    | Married                         |
| 425   | 2    | Divorced                        |
| 217   | 3    | Widowed                         |
| 71    | 4    | Separated                       |
| 981   | 5    | Never Married                   |
| 315   | 6    | A member of an unmarried couple |
| 56    | 9    | Refused                         |
| 0     | 98   | Skipped                         |
| 0     | 99   | Not Asked                       |

=====

Name: DPS047\_1  
Description: Child\_Grps - I have no children

| Count | Code | Label     |
|-------|------|-----------|
| 2173  | 1    | Yes       |
| 1827  | 2    | No        |
| 0     | 8    | Skipped   |
| 0     | 9    | Not Asked |

=====

Name: DPS047\_2  
Description: Child\_Grps - 0-2 years

| Count | Code | Label     |
|-------|------|-----------|
| 327   | 1    | Yes       |
| 3673  | 2    | No        |
| 0     | 8    | Skipped   |
| 0     | 9    | Not Asked |

=====

Name: DPS047\_3  
Description: Child\_Grps - 3-5 years

| Count | Code | Label     |
|-------|------|-----------|
| 324   | 1    | Yes       |
| 3676  | 2    | No        |
| 0     | 8    | Skipped   |
| 0     | 9    | Not Asked |

=====

Name: DPS047\_4  
Description: Child\_Grps - 6-10 years

| Count | Code | Label     |
|-------|------|-----------|
| 424   | 1    | Yes       |
| 3576  | 2    | No        |
| 0     | 8    | Skipped   |
| 0     | 9    | Not Asked |

```

=====
Name:          DPS047_5
Description:   Child_Grps - 11-13 years
Count Code    Label
-----  ----  -----
289  1      Yes
3711 2      No
0    8      Skipped
0    9      Not Asked
=====

```

```

=====
Name:          DPS047_6
Description:   Child_Grps - 14-18 years
Count Code    Label
-----  ----  -----
408  1      Yes
3592 2      No
0    8      Skipped
0    9      Not Asked
=====

```

```

=====
Name:          DPS047_7
Description:   Child_Grps - 19 years or older
Count Code    Label
-----  ----  -----
702  1      Yes
3298 2      No
0    8      Skipped
0    9      Not Asked
=====

```

```

=====
Name: DPS047_8
Description: Child_Grps - Refused
Count Code    Label
-----  ----  -----
106  1      Yes
3894 2      No
0    8      Skipped
0    9      Not Asked
=====

```

```

=====
Name: DPS048
Description: Educa
Count Code    Label
-----  ----  -----
15  1      Never attended school or only attended kindergarten
33  2      Grades 1 through 8 (elementary)
193 3      Grades 9 through 11 (some high school)
1321 4     Grades 12 or GED (high school graduate or GED certificate)
1212 5     College 1 year to 3 years (Some college or technical school,
779  6     College 4 years or more (College graduate)
=====

```

|     |    |                                                  |
|-----|----|--------------------------------------------------|
| 396 | 7  | Postgraduate degree (MA, MBA, MD, JD, PhD, etc.) |
| 50  | 9  | Refused                                          |
| 1   | 98 | Skipped                                          |
| 0   | 99 | Not Asked                                        |

=====  
Name: DPS049

Description: Employ

| Count | Code | Label                            |
|-------|------|----------------------------------|
| ----- | ---- | -----                            |
| 1297  | 1    | Employed for wages, full-time    |
| 422   | 2    | Employed for wages, part-time    |
| 263   | 3    | Self-employed                    |
| 276   | 4    | Out of work for more than 1 year |
| 136   | 5    | Out of work for less than 1 year |
| 411   | 6    | A Homemaker                      |
| 206   | 7    | A Student                        |
| 911   | 8    | Retired                          |
| 78    | 9    | Refused                          |
| 0     | 98   | Skipped                          |
| 0     | 99   | Not Asked                        |

=====  
Name: DPS050

Description: Income

| Count | Code | Label                          |
|-------|------|--------------------------------|
| ----- | ---- | -----                          |
| 375   | 1    | Less than \$10,000             |
| 264   | 2    | \$10,000 to less than \$15,000 |
| 251   | 3    | \$15,000 to less than \$20,000 |
| 296   | 4    | \$20,000 to less than \$25,000 |
| 454   | 5    | \$25,000 to less than \$35,000 |
| 536   | 6    | \$35,000 to less than \$50,000 |
| 675   | 7    | \$50,000 to less than \$75,000 |
| 736   | 8    | \$75,000 or more               |
| 412   | 9    | Refused                        |
| 1     | 98   | Skipped                        |
| 0     | 99   | Not Asked                      |

=====  
Name: DPS051\_lang

Description: Language

| Count | Code | Label                             |
|-------|------|-----------------------------------|
| ----- | ---- | -----                             |
| 3677  | 1    | English                           |
| 72    | 2    | Spanish                           |
| 175   | 3    | Both, Spanish and English equally |
| 49    | 4    | Other                             |
| 24    | 9    | Refused                           |
| 3     | 98   | Skipped                           |

0 99 Not Asked

=====  
Name: Q1\_1

Description: Gun ownership status - Owner, gifted

| Count | Code | Label     |
|-------|------|-----------|
| 523   | 1    | Yes       |
| 3477  | 2    | No        |
| 0     | 8    | Skipped   |
| 0     | 9    | Not Asked |

=====  
Name: Q1\_2

Description: Gun ownership status - Owner, bought before 2000

| Count | Code | Label     |
|-------|------|-----------|
| 457   | 1    | Yes       |
| 3543  | 2    | No        |
| 0     | 8    | Skipped   |
| 0     | 9    | Not Asked |

=====  
Name: Q1\_3

Description: Gun ownership status - Owner, bought after 2000

| Count | Code | Label     |
|-------|------|-----------|
| 382   | 1    | Yes       |
| 3618  | 2    | No        |
| 0     | 8    | Skipped   |
| 0     | 9    | Not Asked |

=====  
Name: Q1\_4

Description: Gun ownership status - Owner, hunter

| Count | Code | Label     |
|-------|------|-----------|
| 178   | 1    | Yes       |
| 3822  | 2    | No        |
| 0     | 8    | Skipped   |
| 0     | 9    | Not Asked |

=====  
Name: Q1\_5

Description: Gun ownership status - Owner, attended safety classes

| Count | Code | Label     |
|-------|------|-----------|
| 362   | 1    | Yes       |
| 3638  | 2    | No        |
| 0     | 8    | Skipped   |
| 0     | 9    | Not Asked |

Name: Q1\_6

Description: Gun ownership status - Owner, advocate responsible ownership

| Count | Code | Label     |
|-------|------|-----------|
| 606   | 1    | Yes       |
| 3394  | 2    | No        |
| 0     | 8    | Skipped   |
| 0     | 9    | Not Asked |

=====  
Name: Q1\_7

Description: Gun ownership status - Non-owner, might buy

| Count | Code | Label     |
|-------|------|-----------|
| 1066  | 1    | Yes       |
| 2934  | 2    | No        |
| 0     | 8    | Skipped   |
| 0     | 9    | Not Asked |

=====  
Name: Q1\_8

Description: Gun ownership status - Non-owner, will never buy

| Count | Code | Label     |
|-------|------|-----------|
| 1812  | 1    | Yes       |
| 2188  | 2    | No        |
| 0     | 8    | Skipped   |
| 0     | 9    | Not Asked |

=====  
Name: Q2\_1

Description: Family gun ownership culture - No friends own guns

| Count | Code | Label     |
|-------|------|-----------|
| 567   | 1    | Yes       |
| 3433  | 2    | No        |
| 0     | 8    | Skipped   |
| 0     | 9    | Not Asked |

=====  
Name: Q2\_2

Description: Family gun ownership culture - No family members own guns

| Count | Code | Label     |
|-------|------|-----------|
| 479   | 1    | Yes       |
| 3521  | 2    | No        |
| 0     | 8    | Skipped   |
| 0     | 9    | Not Asked |

=====  
Name: Q2\_3

Description: Family gun ownership culture - Some friends own guns

| Count | Code | Label     |
|-------|------|-----------|
| 1678  | 1    | Yes       |
| 2322  | 2    | No        |
| 0     | 8    | Skipped   |
| 0     | 9    | Not Asked |

=====  
Name: Q2\_4

Description: Family gun ownership culture - Some family members own gun

| Count | Code | Label     |
|-------|------|-----------|
| 1840  | 1    | Yes       |
| 2160  | 2    | No        |
| 0     | 8    | Skipped   |
| 0     | 9    | Not Asked |

=====  
Name: Q2\_5

Description: Family gun ownership culture - Social circle thinks less of non-ownership

| Count | Code | Label     |
|-------|------|-----------|
| 95    | 1    | Yes       |
| 3905  | 2    | No        |
| 0     | 8    | Skipped   |
| 0     | 9    | Not Asked |

=====  
Name: Q2\_6

Description: Family gun ownership culture - Family thinks less of non-ownership

| Count | Code | Label     |
|-------|------|-----------|
| 112   | 1    | Yes       |
| 3888  | 2    | No        |
| 0     | 8    | Skipped   |
| 0     | 9    | Not Asked |

=====  
Name: Q2\_7

Description: Family gun ownership culture - Social life with family involves guns

| Count | Code | Label     |
|-------|------|-----------|
| 292   | 1    | Yes       |
| 3708  | 2    | No        |
| 0     | 8    | Skipped   |
| 0     | 9    | Not Asked |

=====  
Name: Q2\_8

Description: Family gun ownership culture - Social life with friends involves guns

| Count | Code | Label |
|-------|------|-------|
|-------|------|-------|

|      |   |           |
|------|---|-----------|
| 309  | 1 | Yes       |
| 3691 | 2 | No        |
| 0    | 8 | Skipped   |
| 0    | 9 | Not Asked |

=====  
Name: Q2\_9  
Description: Family gun ownership culture - None

| Count | Code | Label     |
|-------|------|-----------|
| 683   | 1    | Yes       |
| 3317  | 2    | No        |
| 0     | 8    | Skipped   |
| 0     | 9    | Not Asked |

=====  
Name: Q3\_1  
Description: Gun ownership attitude - Carrying gun feels safe

| Count | Code | Label     |
|-------|------|-----------|
| 1113  | 1    | Yes       |
| 2887  | 2    | No        |
| 0     | 8    | Skipped   |
| 0     | 9    | Not Asked |

=====  
Name: Q3\_2  
Description: Gun ownership attitude - Carrying gun feels powerful

| Count | Code | Label     |
|-------|------|-----------|
| 694   | 1    | Yes       |
| 3306  | 2    | No        |
| 0     | 8    | Skipped   |
| 0     | 9    | Not Asked |

=====  
Name: Q3\_3  
Description: Gun ownership attitude - Belonging to organization feels safe

| Count | Code | Label     |
|-------|------|-----------|
| 719   | 1    | Yes       |
| 3281  | 2    | No        |
| 0     | 8    | Skipped   |
| 0     | 9    | Not Asked |

=====  
Name: Q3\_4  
Description: Gun ownership attitude - Belonging to organization feels powerful

| Count | Code | Label |
|-------|------|-------|
| 605   | 1    | Yes   |
| 3395  | 2    | No    |

0 8 Skipped  
0 9 Not Asked

=====  
Name: Q3\_5

Description: Gun ownership attitude - Don't like being around guns / could hurt someone

| Count | Code | Label     |
|-------|------|-----------|
| 991   | 1    | Yes       |
| 3009  | 2    | No        |
| 0     | 8    | Skipped   |
| 0     | 9    | Not Asked |

=====  
Name: Q3\_6

Description: Gun ownership attitude - Don't like people with guns / might kill someone

| Count | Code | Label     |
|-------|------|-----------|
| 453   | 1    | Yes       |
| 3547  | 2    | No        |
| 0     | 8    | Skipped   |
| 0     | 9    | Not Asked |

=====  
Name: Q3\_7

Description: Gun ownership attitude - People feel nervous around people with guns

| Count | Code | Label     |
|-------|------|-----------|
| 749   | 1    | Yes       |
| 3251  | 2    | No        |
| 0     | 8    | Skipped   |
| 0     | 9    | Not Asked |

=====  
Name: Q3\_8

Description: Gun ownership attitude - Respected people wouldn't have gun

| Count | Code | Label     |
|-------|------|-----------|
| 520   | 1    | Yes       |
| 3480  | 2    | No        |
| 0     | 8    | Skipped   |
| 0     | 9    | Not Asked |

=====  
Name: Q3\_9

Description: Gun ownership attitude - Wish everyone get rid of guns

| Count | Code | Label     |
|-------|------|-----------|
| 679   | 1    | Yes       |
| 3321  | 2    | No        |
| 0     | 8    | Skipped   |
| 0     | 9    | Not Asked |

=====  
Name: Q3\_10

Description: Gun ownership attitude - None

| Count | Code | Label     |
|-------|------|-----------|
| 1116  | 1    | Yes       |
| 2884  | 2    | No        |
| 0     | 8    | Skipped   |
| 0     | 9    | Not Asked |

=====  
Name: Q4\_1

Description: Attitude towards aggression - Must fight to show you're not a wimp

| Count | Code | Label     |
|-------|------|-----------|
| 128   | 1    | Yes       |
| 3872  | 2    | No        |
| 0     | 8    | Skipped   |
| 0     | 9    | Not Asked |

=====  
Name: Q4\_2

Description: Attitude towards aggression - Must fight to get pride back

| Count | Code | Label     |
|-------|------|-----------|
| 86    | 1    | Yes       |
| 3914  | 2    | No        |
| 0     | 8    | Skipped   |
| 0     | 9    | Not Asked |

=====  
Name: Q4\_3

Description: Attitude towards aggression - People will pay if I don't get what I want

| Count | Code | Label     |
|-------|------|-----------|
| 160   | 1    | Yes       |
| 3840  | 2    | No        |
| 0     | 8    | Skipped   |
| 0     | 9    | Not Asked |

=====  
Name: Q4\_4

Description: Attitude towards aggression - Feel awful if didn't fight

| Count | Code | Label     |
|-------|------|-----------|
| 126   | 1    | Yes       |
| 3874  | 2    | No        |
| 0     | 8    | Skipped   |
| 0     | 9    | Not Asked |

=====  
Name: Q4\_5

Description: Attitude towards aggression - Beating up person that insults makes me feel better

| Count | Code | Label     |
|-------|------|-----------|
| 115   | 1    | Yes       |
| 3885  | 2    | No        |
| 0     | 8    | Skipped   |
| 0     | 9    | Not Asked |

=====  
Name: Q4\_6

Description: Attitude towards aggression - Must fight if you don't want to be a chump

| Count | Code | Label     |
|-------|------|-----------|
| 103   | 1    | Yes       |
| 3897  | 2    | No        |
| 0     | 8    | Skipped   |
| 0     | 9    | Not Asked |

=====  
Name: Q4\_7

Description: Attitude towards aggression - A person who doesn't get even is a sucker

| Count | Code | Label     |
|-------|------|-----------|
| 68    | 1    | Yes       |
| 3932  | 2    | No        |
| 0     | 8    | Skipped   |
| 0     | 9    | Not Asked |

=====  
Name: Q4\_8

Description: Attitude towards aggression - Social circle thinks I'm weak without gun

| Count | Code | Label     |
|-------|------|-----------|
| 36    | 1    | Yes       |
| 3964  | 2    | No        |
| 0     | 8    | Skipped   |
| 0     | 9    | Not Asked |

=====  
Name: Q4\_9

Description: Attitude towards aggression - None

| Count | Code | Label     |
|-------|------|-----------|
| 3445  | 1    | Yes       |
| 555   | 2    | No        |
| 0     | 8    | Skipped   |
| 0     | 9    | Not Asked |

=====  
Name: Q5\_1

Description: Reasons for owning a gun - Exciting to hold loaded gun

| Count | Code | Label     |
|-------|------|-----------|
| 71    | 1    | Yes       |
| 3929  | 2    | No        |
| 0     | 8    | Skipped   |
| 0     | 9    | Not Asked |

=====  
Name: Q5\_2

Description: Reasons for owning a gun - People will look up to me

| Count | Code | Label     |
|-------|------|-----------|
| 34    | 1    | Yes       |
| 3966  | 2    | No        |
| 0     | 8    | Skipped   |
| 0     | 9    | Not Asked |

=====  
Name: Q5\_3

Description: Reasons for owning a gun - Feel powerful or protected on street

| Count | Code | Label     |
|-------|------|-----------|
| 266   | 1    | Yes       |
| 3734  | 2    | No        |
| 0     | 8    | Skipped   |
| 0     | 9    | Not Asked |

=====  
Name: Q5\_4

Description: Reasons for owning a gun - Feels powerful to hold loaded gun

| Count | Code | Label     |
|-------|------|-----------|
| 60    | 1    | Yes       |
| 3940  | 2    | No        |
| 0     | 8    | Skipped   |
| 0     | 9    | Not Asked |

=====  
Name: Q5\_5

Description: Reasons for owning a gun - Don't owe the world anything

| Count | Code | Label     |
|-------|------|-----------|
| 580   | 1    | Yes       |
| 3420  | 2    | No        |
| 0     | 8    | Skipped   |
| 0     | 9    | Not Asked |

=====  
Name: Q5\_6

Description: Reasons for owning a gun - Fun to play around with real gun

| Count | Code  | Label |
|-------|-------|-------|
| ----- | ----- | ----- |

|      |   |           |
|------|---|-----------|
| 82   | 1 | Yes       |
| 3918 | 2 | No        |
| 0    | 8 | Skipped   |
| 0    | 9 | Not Asked |

=====  
Name: Q5\_7

Description: Reasons for owning a gun - Care about how actions affect others

| Count | Code | Label |
|-------|------|-------|
|-------|------|-------|

|       |       |           |
|-------|-------|-----------|
| ----- | ----- | -----     |
| 470   | 1     | Yes       |
| 3530  | 2     | No        |
| 0     | 8     | Skipped   |
| 0     | 9     | Not Asked |

=====  
Name: Q5\_8

Description: Reasons for owning a gun - Responsibility to make world a better place

| Count | Code | Label |
|-------|------|-------|
|-------|------|-------|

|       |       |           |
|-------|-------|-----------|
| ----- | ----- | -----     |
| 485   | 1     | Yes       |
| 3515  | 2     | No        |
| 0     | 8     | Skipped   |
| 0     | 9     | Not Asked |

=====  
Name: Q5\_9

Description: Reasons for owning a gun - None

| Count | Code | Label |
|-------|------|-------|
|-------|------|-------|

|       |       |           |
|-------|-------|-----------|
| ----- | ----- | -----     |
| 2464  | 1     | Yes       |
| 1536  | 2     | No        |
| 0     | 8     | Skipped   |
| 0     | 9     | Not Asked |

=====  
Name: Q6\_1

Description: Exposure to violence - Current neighborhood has low crime

| Count | Code | Label |
|-------|------|-------|
|-------|------|-------|

|       |       |           |
|-------|-------|-----------|
| ----- | ----- | -----     |
| 2970  | 1     | Yes       |
| 1030  | 2     | No        |
| 0     | 8     | Skipped   |
| 0     | 9     | Not Asked |

=====  
Name: Q6\_2

Description: Exposure to violence - Current neighborhood has crime, is unsafe

| Count | Code | Label |
|-------|------|-------|
|-------|------|-------|

|       |       |       |
|-------|-------|-------|
| ----- | ----- | ----- |
| 313   | 1     | Yes   |
| 3687  | 2     | No    |

0 8 Skipped  
0 9 Not Asked

=====  
Name: Q6\_3

Description: Exposure to violence - Have been shot at before

| Count | Code | Label     |
|-------|------|-----------|
| 164   | 1    | Yes       |
| 3836  | 2    | No        |
| 0     | 8    | Skipped   |
| 0     | 9    | Not Asked |

=====  
Name: Q6\_t

Description: Exposure to violence - Have been shot at before - Number of times

| Count | Code | Label     |
|-------|------|-----------|
| 3835  | -9   | Not Asked |
| 3     | -8   | Skipped   |

=====  
Name: Q6\_4

Description: Exposure to violence - Someone has inflicted physical violence

| Count | Code | Label     |
|-------|------|-----------|
| 1011  | 1    | Yes       |
| 2989  | 2    | No        |
| 0     | 8    | Skipped   |
| 0     | 9    | Not Asked |

=====  
Name: Q6\_5

Description: Exposure to violence - Someone has inflicted threats

| Count | Code | Label     |
|-------|------|-----------|
| 758   | 1    | Yes       |
| 3242  | 2    | No        |
| 0     | 8    | Skipped   |
| 0     | 9    | Not Asked |

=====  
Name: Q6\_6

Description: Exposure to violence - Witnessed violence

| Count | Code | Label     |
|-------|------|-----------|
| 1235  | 1    | Yes       |
| 2765  | 2    | No        |
| 0     | 8    | Skipped   |
| 0     | 9    | Not Asked |



# Supplementary Appendix III: Survey Methodology Report from YouGov

Prepared by YouGov

December  
2013

## 1. Introduction

In October and November 2013, YouGov conducted a survey among individuals in United States age >18 years. YouGov conducted 4,486 interviews in English among this population. All respondents were administered questions about knowledge about and experiences with guns. The set of interviews was then matched down to a sample of 4,000 to produce the final dataset.

In this report we describe:

- How respondents were recruited into the YouGov Panel
- The process of sample matching and the creation of weights
- The response rate for the survey

## 2. Survey Panel Data

Panel members who participated in the survey were recruited by a number of methods and on a variety of topics to help ensure diversity in the panel population. In the United States, the YouGov panel — a proprietary opt-in survey panel — is comprised of 1.2 million U.S. residents who have agreed to participate in YouGov's Web surveys. At any given time, YouGov maintains a minimum of five recruitment campaigns based on salient current events.

Panel members are recruited by a number of methods to help ensure diversity in the panel population. Recruiting methods include Web advertising campaigns (public surveys), permission-based email campaigns, partner sponsored solicitations, telephone-to-Web recruitment (RDD based sampling, and mail-to-Web recruitment (voter registration based sampling).

The primary method of recruitment for the YouGov panel is Web advertising campaigns that target respondents based on their keyword searches. In practice, a search in Google may prompt an active YouGov advertisement inviting their opinion on the search topic. At the conclusion of the short survey respondents are invited to join the YouGov panel in order to directly receive and participate in additional surveys. After a double opt-in procedure, where respondents must confirm their consent again by responding to an email, the

database checks to ensure the newly recruited panelist is in fact new and that the address information provided is valid.

Additionally, YouGov occasionally augments the panel with difficult to recruit respondents by soliciting panelists in telephone and mail surveys. For instance, in the United States YouGov conducted telephone-to-Web recruitment in the fall and winter of 2010 and 2012. Respondents provided a working email where they could receive an electronic invitation and confirm their consent and interest in receiving and participating in YouGov Web surveys. At the conclusion of that survey, respondents were invited to become YouGov members and receive additional survey invitations to their email address.

By utilizing different modes of recruitment continuously over time, this ensures that hard-to-reach populations will be adequately represented in survey samples. Participants are not paid to join the YouGov panel, but do receive incentives through a loyalty program to take individual surveys.

### 3. Survey Administration and Quality Assurance

YouGov managed the questionnaire consulting, sample design, programming, pre-testing, data collection, data processing, data analysis, and documentation for the Project. This section provides details about survey procedures and deliverables.

#### 3.1 Survey Invitations

Each respondent was invited to the survey by an email invitation that included a button that the respondent clicked on to take the survey; this is supported using HTML-based email that contains links. In every survey invitation, the button links to a unique URL that provides the respondent secure access to review the consent form and complete their Web survey. The unique URL also supports survey resumption during the entire field period. Prior to completing the survey, respondents may close their browser and return to the same point in the survey to resume their interview simply by selecting their unique URL again. Once a respondent has completed their survey and submitted their answers, that unique URL to their survey is not available for a respondent to access again. This prevents respondents from taking the survey more than one time.

#### 3.2 Incentives

YouGov awards “polling points” to incentivize panelists for every survey they take. Panelists can redeem points for rewards, including \$100 for 100,000 points in the United States. Participants in this study were awarded a minimum of 500 points for their participation.

### 3.3 Survey Programming and Administration Processes

YouGov employs a number of quality assurance steps to ensure data integrity. Data integrity requires accurate programming, extensive end-to-end testing, data export and tabulations of test data prior to launching with a live sample, and pre-testing with a small sample of the population. At all steps of this process, YouGov employs redundancy checks to protect the quality of the data.

Additionally, YouGov employs a number of innovative technology checks that ensure that data collection proceeds without load or bandwidth issues. Our Survey Services and Information Services teams use network monitoring application software that monitors the performance of our data collection servers constantly. The Information Services team responds to any performance issues 24 hours a day, 7 days a week.

For this Study, YouGov systematically checked the skip patterns and branching logic of the survey instruments before the survey launched and also examined the integrity of the data collection by examining the data collected during the initial soft launch.

## 4. Study Sampling Frame:

Sampling targets were set based on gender, age, race, and education using information from the 2010 American Community Survey. After matching, YouGov then weighted the matched set of survey respondents to known characteristics in the United States using propensity score weighting. Table 1 shows the baseline sampling targets for the study.

Table 1: Sampling Targets for the Study Sampling Frame

|           |                            | Target |
|-----------|----------------------------|--------|
| Race      | Black                      | 12%    |
|           | Hispanic                   | 14%    |
|           | White+ all other           | 74%    |
| Age       | 18-29                      | 22%    |
|           | 30-44                      | 26%    |
|           | 45-64                      | 35%    |
|           | 54+                        | 17%    |
| Gender    | Male                       | 48%    |
|           | Female                     | 52%    |
| Education | Less than high school grad | 15%    |
|           | High school grad           | 29%    |

|  |              |     |
|--|--------------|-----|
|  | Some college | 31% |
|  | College grad | 17% |
|  | Post grad    | 9%  |

In the next section, we describe the sample matching process.

## 5. Sample Matching

Sample matching is a methodology for selection of “representative” samples from non-randomly selected pools of respondents. It is ideally suited for Web access panels, but could also be used for other types of surveys, such as phone surveys. Sample matching starts with an enumeration of the target population. For general population studies, the target population is all adults, and can be enumerated through the use of the decennial Census or a high quality survey, such as the American Community Survey or National Health and Nutrition Examination Survey. In other contexts, this is known as the sampling frame, though, unlike conventional sampling, the sample is not drawn from the frame. Traditional sampling, then, selects individuals from the sampling frame at random for participation in the study. This may not be feasible or economical as the contact information, especially email addresses, is not available for all individuals in the frame and refusals to participate increase the costs of sampling in this way.

Sample selection using the matching methodology is a two-stage process. First, a random sample is drawn from the target population. We call this sample the target sample. Details on how the target sample is drawn are provided below, but the essential idea is that this sample is a true probability sample and thus representative of the frame from which it was drawn.

Second, for each member of the target sample, we select one or more matching members from our pool of opt-in respondents. This is called the matched sample. Matching is accomplished using a large set of variables that are available in consumer and voter databases for both the target population and the opt-in panel.

The purpose of matching is to find an available respondent who is as similar as possible to the selected member of the target sample. The result is a sample of respondents who have the same measured characteristics as the target sample. Under certain conditions, described below, the matched sample will have similar properties to a true random sample. That is, the matched sample mimics the characteristics of the target sample. It is, as far as we can tell, “representative” of the target population (because it is similar to the target sample).

When choosing the matched sample, it is necessary to find the closest matching respondent in the panel of opt-ins to each member of the target sample. Various types of matching could be employed: exact matching, propensity score matching, and proximity matching. Exact matching is impossible if the set of characteristics used for matching is large and, even for a small set of characteristics, requires a very large panel (to find an exact match). Propensity score matching has the disadvantage of requiring estimation of the propensity score. Either a propensity score needs to be estimated for each individual study, so the procedure is automatic, or a single propensity score must be estimated for all studies. If large numbers of variables are used the estimated propensity scores can become unstable and lead to poor samples.

YouGov employs the proximity matching method. For each variable used for matching, we define a distance function,  $d(x,y)$ , which describes how “close” the values  $x$  and  $y$  are on a particular attribute. The overall distance between a member of the target sample and a member of the panel is a weighted sum of the individual distance functions on each attribute. The weights can be adjusted for each study based upon which variables are thought to be important for that study, though, for the most part, we have not found the matching procedure to be sensitive to small adjustments of the weights. A large weight, on the other hand, forces the algorithm toward an exact match on that dimension.

## 5.1 Theoretical Background for Sample Matching

To understand better the sample matching methodology, it may be helpful to think of the target sample as a simple random sample (SRS) from the target population. The SRS yields unbiased estimates because the selection mechanism is unrelated to particular characteristics of the population. The efficiency of the SRS can be improved by using stratified sampling in place of simple random sampling. SRS is generally less efficient than stratified sampling because the size of population subgroups varies in the target sample.

Stratified random sampling partitions the population into a set of categories that are believed to be more homogeneous than the overall population, called strata. For example, we might divide the population into race, age, and gender categories. The cross-classification of these three attributes divides the overall population into a set of mutually exclusive and exhaustive groups, or strata. Then an SRS is drawn from each category and the combined set of respondents constitutes a stratified sample. If the number of respondents selected in each strata is proportional to

their frequency in the target population, then the sample is self-representing and requires no additional weighting.

The theory behind sample matching is analogous to stratified sampling: if respondents who are similar on a large number of characteristics tend to be similar on other items for which we lack data, then substituting one for the other should have little impact upon the sample. This approach can be made rigorous under certain assumptions.

- Assumption 1: Ignorability. Panel participation is assumed to be ignorable with respect to the variables measured by survey conditional upon the variables used for matching. That is, if we examined panel participants and non-participants who have exactly the same values of the matching variables, on average there would be no difference between how these sets of respondents answered the survey. This does not imply that panel participants and non-participants are identical, but only that the differences between them are captured by the variables used for matching. Since the set of data used for matching is quite extensive, this is, in most cases, a plausible assumption.
- Assumption 2: Smoothness. The expected value of the survey items given the variables used for matching is a “smooth” function. Smoothness is a technical term meaning that the function is continuously differentiable with bounded first derivative. In practice, this means that the expected value function does not have any kinks or jumps.
- Assumption 3: Common Support. The variables used for matching must have a distribution that covers the same range of values for panelists and non-panelists. More precisely, the probability distribution of the matching variables must be bounded away from zero for panelists on the range of values (known as the “support”) taken by the non-panelists. In practice, this excludes attempts to match on variables for which there are no possible matches within the panel. For instance, it would be impossible to match on computer usage because there are no panelists without some experience using computers.

## 5.2. Stratification and Matching in the Study

The sample drawn for this study was chosen from the YouGov Panel using a four-way cross-classification (age x gender x race x education). The final set of

completed interviews was then matched to the target frame using a weighted Euclidean distances metric.

The following distance functions were used for the match:

```
fmatch ← function(target, pool) {  
  4 * DIST(age)/10 +  
  3 * DIFF(gender) +  
  2 * DIFF(race4) +  
  2 * DIFF(educ4) +  
  1 * (mat.newsint[target$newsint, pool$newsint]) +  
  1 * (mat.ideo5[target$ideo5, pool$ideo5])  
}
```

Where the matching variables were:

- age: respondent's age in years
- gender: respondent's gender
- race4: categorical race variable with categories white, black, and Hispanic/Latino, and other
- educ4: categorical education variable with categories high school grad or less, some college, college grad, post graduate degree
- newsint: 4-point interest in politics plus a "Don't know" category
- ideo5: 5-point ideology plus a "Don't know" category

## 6. Weighting

The matched cases were then weighted to the sampling frame using propensity scores. The matched cases and the frame were combined and a logistic regression was estimated for inclusion in the frame. The propensity score function included age, years of education, gender, race/ethnicity, predicted voter registration, news interest, inability to place oneself on an ideological scale, and baseline party identification. The propensity scores were grouped into deciles of the estimated propensity score in the frame and post-stratified according to these deciles. The final weights were then post-stratified by gender, race, education, and age. Weights larger than 7 were trimmed and the final weights normalized to equal sample size. The following formula was used for propensity score weighting:

```
form ← ~(age + I(age <30) + I(age >64)) * I(gender==2) +  
  releval(factor(race4), 1)  
  * educyrs + I(race4 == 2)
```

```

* I(gender == 2) +
I(race4 == 3) * I(gender
== 2) + I(race4 == 2) *
I(age <30) +
I(race4 == 3) * I(age
<30) + I(race4 == 2)
* I(eduycrs <14) +
I(race4 == 3) * I(eduycrs <14) *
I(gender == 2) + I(eduycrs <14) *
I(age <30) +
I(eduycrs <14) *
I(age >64) +
I(ideo5 == 1) +
I(ideo5 == 4) +
I(ideo5 == 2) +
I(ideo5 == 3) +
as.factor(marstat) *
age + I(educ5 == 1)
* I(age >64)

```

Where the weighting variables were:

- age: respondent's age in years
- gender: respondent's gender
- race4: categorical race variable with categories white, black, and Hispanic/Latino, and other
- educ5: categorical education variable with categories less than high school, high school grad, some college, college grad, post graduate degree
- educes: education in number of years completed (e.g., high school graduate = 12)
- ideo5: 5-point ideology plus a "Don't know" category
- marstat: marital status

Table 2 shows the correspondence between the sampling targets and the final unweighted and weighted sample composition.

Table 2: Demographic Characteristics of the Study

|           |                       | Target | Unweighted Sample | Weighted Sample |
|-----------|-----------------------|--------|-------------------|-----------------|
| Race      | Black                 | 12%    | 12%               | 12%             |
|           | Hispanic              | 14%    | 12%               | 14%             |
|           | White + all other     | 74%    | 76%               | 74%             |
| Age       | 18-29                 | 22%    | 22%               | 22%             |
|           | 30-44                 | 26%    | 27%               | 26%             |
|           | 45-64                 | 35%    | 36%               | 35%             |
|           | 54+                   | 17%    | 16%               | 17%             |
| Gender    | Male                  | 48%    | 45%               | 48%             |
|           | Female                | 52%    | 55%               | 52%             |
| Education | Less than high school | 15%    | 6%                | 14%             |
|           | High school grad      | 29%    | 33%               | 29%             |
|           | Some college          | 31%    | 31%               | 31%             |
|           | College grad          | 17%    | 20%               | 17%             |
|           | Post grad             | 9%     | 10%               | 9%              |

Table 3: Response Rate for the Study

|             |                     |
|-------------|---------------------|
| Invitations | 11471               |
| Starts      | 5,392               |
| Completes   | 4,622               |
| Incompletes | 770                 |
| Nonresponse | 6,079               |
|             |                     |
| RR1         | 4,622/11471 (40.3%) |
| RR2         | 5,392/11471 (47.0%) |

## 7. Response Rate

Table 3 shows the respondent dispositions. RR1 and RR2 reflect within-panel response rates.

## Supplementary Appendix IV: Covariates used for analysis

Individual characteristics considered were age, gender, race, ethnicity, marital status, education, employment, income, language, number of children, neighborhood crime and violence exposure. State-level characteristics were strength of gun policy in the respondent's home state using the Brady Law strength score and 2011 state-specific gun fatality rates.

**Age:** All respondents were above 18 years. We dichotomized age at 55 years with two groups: Those greater than 55 years old and those between 19 to 55 years old. The reference group was 19 to 55 years old.

**Gender:** Male versus female (reference)

**Race:** Since race was indicated by multiple variables, we used the variables DPS044\_1 DPS044\_2 DPS044\_3 DPS044\_4 DPS044\_5 DPS044\_6 DPS044\_9 to create a race category of "white", "black" and "other". Race was categorized as "white" if  $DPS044_1=1$  &  $(DPS044_2 \neq 1 \text{ \& } DPS044_3 \neq 1 \text{ \& } DPS044_4 \neq 1 \text{ \& } DPS044_5 \neq 1 \text{ \& } DPS044_6 \neq 1)$ . Race was categorized as "black" if  $DPS044_2=1$ . Race was categorized as other for all the rest of the individuals who were not categorized as either "white" or "black". We further dichotomized as "black" and "not-black", where "not-black" included both "white" and "other".

**Ethnicity:** Ethnicity was asked as a separate question with categories "Hispanic" and "Non-Hispanic" and was not incorporated to the questions regarding race.

**Marital status:** We categorized marital status into 3 main categories from the nine mutually exclusive categories of marital status in the questionnaire. Never married was the reference category with responses "married" and "a member of an unmarried couple" categorized as currently married and responses "divorced", "widowed", "separated" was categorized as formerly married.

**Education:** We use education as four categories after pooling 9 mutually exclusive responses. "Never attended school or only attended kindergarten", "Grades 1 through 8 (elementary)" and "Grades 9 through 11 (some high school)" was categorized as "less than high school" and was the reference group. "Grades 12 or GED (high school graduate or GED certificate)" was categorized as "High school/GED", "College 1 year to 3 years (Some college or technical school)" was categorized as "some college" and either "College 4 years or more (College graduate)" and "Postgraduate degree (MA, MBA, MD, JD, PhD, etc.)" was categorized as "more than college".

**Employment:** We used employment as a dichotomous variable of being either employed or not. Reference category was employed. When the response was either “Out of work for more than 1 year” or “Out of work for less than 1 year” was categorized as “unemployed”.

**Income:** Income was used as a 3 category variable: <\$25,000 (reference), \$25,000 to \$50,000 and >=\$50,000 by pooling the 9 categories from the survey

**Language:** We use language variable as those who speak English exclusively from the survey question responses of English, Spanish, both, other.

**Have children:** We used only 1 variable (DPS047\_1- I have no children), to derive whether the respondent had children or not. Reference was “no children”

**Neighborhood crime:** This variable was dichotomized as low crime (reference) and high crime using two variables (Q6\_1 Q6\_2). A neighborhood was considered “low crime” when the response to Q6\_1 was 1. A neighborhood was considered “high crime” when Q6\_1 was 2 and if Q6\_2 is either 1 or 2.

**Violence exposure:** We presented violence exposure in 3 categories: low (reference), medium and high. The variable was constructed from 4 variables Q6\_3 Q6\_4 Q6\_5 Q6\_6. If the respondent reported “yes” to none of these four violence exposure questions were categorized as having “low” violence exposure, if the respondent reported “yes” to only 1 then the category was medium while if the respondent reported “yes” to two or more than two of the four violence exposure.

**State-specific Brady Law strength score:** State-specific firearm related legislation for the year 2011 was obtained from the Brady Center to Prevent Gun Violence and validated using LexisNexis Academic. Since 2007, the Brady Center has published annual reports regarding state-specific firearm legislature and an arbitrary legislative scorecard with specific score criteria and broadly classifies all laws into five categories: (1) curb firearm trafficking; (2) strengthen background checks on purchasers of firearms beyond those required by the Brady Handgun Violence Prevention Act; (3) ensure child safety; (4) ban military style assault weapons; and (5) restrict guns in public places. We used the overall legislative scores and categorized into four groups based on quartiles. The lowest quartile was used as the reference category.

**State-specific gun fatality rates:** Rates of firearm mortality were obtained from querying the restricted version of Centers of Disease Control and Prevention, Web-based Injury Statistics Query and Reporting System (WISQARS) for the year 2011. Mortality data in the WISQARS is compiled by the National Center for Health Statistics using data from the death registry. We categorized gun fatality rates into

four groups based on quartiles. The lowest quartile was used as the reference category.

## Supplementary Table 1: Correlation between variables for social gun culture

|                                                                                | Social circle would think less of me if I do not have/own a gun | Family would think less of me if I do not have/own a gun | A part of my social life involving family involves activities related to guns | A part of my social life involving friends involves activities related to guns |
|--------------------------------------------------------------------------------|-----------------------------------------------------------------|----------------------------------------------------------|-------------------------------------------------------------------------------|--------------------------------------------------------------------------------|
| Social circle would think less of me if I do not have/own a gun                | 1.0000                                                          |                                                          |                                                                               |                                                                                |
| Family would think less of me if I do not have/own a gun                       | 0.4612<br>( $<0.0001$ )                                         | 1.0000                                                   |                                                                               |                                                                                |
| A part of my social life involving family involves activities related to guns  | 0.2529<br>( $<0.0001$ )                                         | 0.2262<br>( $<0.0001$ )                                  | 1.0000                                                                        |                                                                                |
| A part of my social life involving friends involves activities related to guns | 0.2439<br>( $<0.0001$ )                                         | 0.2006<br>( $<0.0001$ )                                  | 0.5451<br>( $<0.0001$ )                                                       | 1.0000                                                                         |

The values are rho (p-value)  
 Rho is spearman's coefficient

## Supplementary Table 2: Association of individual and state characteristics with gun ownership (sensitivity analysis)

|                                | Crude OR<br>(95%CI) | P       | MV OR<br>(95% CI) | P       |
|--------------------------------|---------------------|---------|-------------------|---------|
| Social gun culture             |                     | <0.0001 |                   | <0.0001 |
| No                             | Reference           |         | Reference         |         |
| Yes                            | 3.32 (2.91-3.78)    |         | 2.20 (1.91-2.52)  |         |
| Age                            |                     | <0.0001 |                   | <0.0001 |
| 19-55 years                    | Reference           |         | Reference         |         |
| >55 years                      | 1.41 (1.28-1.55)    |         | 1.21 (1.10-1.34)  |         |
| Hispanic                       |                     | <0.0001 |                   | 0.17    |
| No                             | Reference           |         | Reference         |         |
| Yes                            | 0.64 (0.52-0.79)    |         | 0.78 (0.54-1.11)  |         |
| Black race                     |                     | <0.0001 |                   | <0.0001 |
| No                             | Reference           |         | Reference         |         |
| Yes                            | 0.48 (0.37-0.62)    |         | 0.53 (0.41-0.68)  |         |
| Gender                         |                     | <0.0001 |                   | <0.0001 |
| Female                         | Reference           |         | Reference         |         |
| Male                           | 1.74 (1.55-1.96)    |         | 1.64 (1.45-1.85)  |         |
| Marital status                 |                     | <0.0001 |                   | <0.0001 |
| Never married                  | Reference           |         | Reference         |         |
| Married/ Partner               | 2.10 (1.78-2.47)    |         | 1.75 (1.47-2.08)  |         |
| Divorced/Widowed/<br>Separated | 1.56 (1.28-1.91)    |         | 1.46 (1.19-1.79)  |         |
| Education                      |                     | 0.44    |                   |         |
| Less than high school          | Reference           |         |                   |         |
| High School/ GED               | 1.27 (0.93-1.74)    |         |                   |         |
| Some college                   | 1.27 (0.95-1.68)    |         |                   |         |
| More than college              | 1.27 (0.93-1.72)    |         |                   |         |
| Unemployed                     |                     | 0.008   |                   | 0.58    |
| No                             | Reference           |         | Reference         |         |
| Yes                            | 0.72 (0.56-0.92)    |         | 0.94 (0.73-1.19)  |         |
| Income                         |                     | <0.0001 |                   | 0.084   |
| <\$25,000                      | Reference           |         | Reference         |         |
| \$25,000 to <\$50,000          | 1.20 (1.00-1.44)    |         | 1.05 (0.86-1.27)  |         |
| ≥\$50,000                      | 1.52 (1.33-1.73)    |         | 1.14 (0.99-1.32)  |         |
| Have children                  |                     | 0.66    |                   |         |
| No                             | Reference           |         |                   |         |
| Yes                            | 1.03 (0.91-1.16)    |         |                   |         |
| Speaks only English            |                     | <0.0001 |                   | 0.60    |
| No                             | Reference           |         | Reference         |         |
| Yes                            | 1.74 (1.28-2.35)    |         | 1.14 (0.70-1.85)  |         |
| Neighborhood crime             |                     | 0.014   |                   | 0.84    |
| Low crime                      | Reference           |         | Reference         |         |
| High crime                     | 0.83 (0.72-0.96)    |         | 0.99 (0.83-1.16)  |         |
| Violence exposure              |                     | <0.0001 |                   | 0.079   |
| Low                            | Reference           |         | Reference         |         |
| Medium                         | 1.09 (0.95-1.25)    |         | 1.13 (0.97-1.32)  |         |
| High                           | 1.41 (1.24-1.60)    |         | 1.17 (1.02-1.35)  |         |
| Brady Law strength score       |                     | <0.0001 |                   | 0.004   |

|                                      |                  |            |                  |       |
|--------------------------------------|------------------|------------|------------------|-------|
| High ( $\geq 59$ )                   | Reference        |            | Reference        |       |
| Moderate ( $< 59$ to $\geq 24$ )     | 1.46 (1.13-1.89) |            | 1.23 (1.01-1.50) |       |
| Mild ( $< 24$ to $\geq 15.5$ )       | 1.80 (1.42-2.28) |            | 1.40 (1.16-1.69) |       |
| Least ( $< 15.5$ )                   | 2.11 (1.63-2.73) |            | 1.32 (1.03-1.68) |       |
| State gun fatality rate              |                  | $< 0.0001$ |                  | 0.005 |
| Lowest ( $\leq 7.7$ )                | Reference        |            | Reference        |       |
| Low ( $> 7.7$ to $\leq 10.7$ )       | 1.36 (0.84-2.20) |            | 1.17 (0.84-1.63) |       |
| Moderate ( $> 10.7$ to $\leq 11.6$ ) | 1.83 (1.14-2.91) |            | 1.38 (0.97-1.97) |       |
| High ( $> 11.6$ )                    | 2.26 (1.41-3.64) |            | 1.52 (1.05-2.20) |       |

Social gun culture was reporting yes to at least two of the four questions: “social circle thinks less of them if they did not own a gun”, “family thinks less of them not owning a gun”, “social life with family involves guns” and “social life with friends involves guns”. Reference was reporting “no” to all four questions.

Modified poisson regression was using Generalized Estimating Equations (GEE) to account for clustering by states. P-values are from weighted poisson regression with cluster option for state.

MV denotes multivariable.
